# Supplementary material for: An oncogenic splice variant of PDGFRα in adult glioblastoma as a therapeutic target for selective CDK4/6 inhibitors
Source: PubMed Central journal article supplement (PMC8786844; doi:10.1038/s41598-022-05391-9), 2022-01-24
Supplement: 41598_2022_5391_MOESM1_ESM.pdf [file 41598_2022_5391_MOESM1_ESM.pdf]

## Supplementary Figures and Tables

### **An Oncogenic Splice Variant of PDGFR $\alpha$ in Adult Glioblastoma as a Therapeutic Target for Selective CDK4/6 Inhibitors**

Taiji Hamada, Toshiaki Akahane, Seiya Yokoyama, Nayuta Higa, Mari Kirishima, Kei Matsuo, Michiko Shimokawa, Koji Yoshimoto,  
Akihide Tanimoto

# Supplementary Table S1

## GBM cases with *PDGFRA* gene amplification and/or mutations

| No | Location           | Age | Sex | TC (%) | VAF (%) | Mutation           | CN | COSMIC ID | JAX                       | OncoKB                    |
|----|--------------------|-----|-----|--------|---------|--------------------|----|-----------|---------------------------|---------------------------|
| 1  | Rt temporal lobe   | 70  | M   | 50     | 69      | p.Gly286Arg        | 40 | 6354900   | NR                        | NR                        |
| 2  | Lt caudate nucleus | 67  | M   | 60     | 87      | p.Asn468Ser        | 84 | 2155032   | NR                        | NR                        |
| 3  | Rt parietal lobe   | 77  | F   | 70     | 39      | p.D842_I843delinsV | 4  | 405285    | GOF (p.D842_I843delinsIM) | GOF (p.D842_I843delinsIM) |
| 4  | Rt radiate crown   | 76  | M   | 60     | 84      | p.Asn468Ser        | 19 | 2155032   | NR                        | NR                        |
| 5  | Lt radiate crown   | 75  | M   | 70     | 69      | p.Ala396Pro        | 32 | -         | NR                        | NR                        |
| 6  | Lt temporal lobe   | 62  | M   | 70     | 28      | p.Cys235Ser        | 50 | 3604496   | VUS                       | NR                        |
|    |                    |     |     | 70     | 40      | p.Pro345Ser        |    | 7697761   | Predicted GOF             | NR                        |
| 7  | Rt temporal lobe   | 81  | F   | 80     | 92      | p.Trp447Cys        | 73 | 3409361   | NR                        | NR                        |
| 8  | Lt cerebellum      | 67  | M   | 50     | 17      | p.Leu275Ser        | 30 | -         | NR                        | NR                        |
| 9  | Left frontal lobe  | 86  | M   | 60     | 76      | p.Asn468Ser        | 26 | 2155032   | NR                        | NR                        |
| 10 | Rt frontal lobe    | 76  | F   | 50     | 43      | p.Ile363Phe        | 3  | -         | NR                        | NR                        |
|    |                    |     |     | 50     | 49      | p.Asp842His        |    | 734174    | GOF (p.Asp842Val)         | GOF (p.Asp842Val)         |
| 11 | Rt frontal lobe    | 72  | M   | 40     | 60      | p.Pro343Ser        | 63 | 6934874   | NR                        | NR                        |
|    |                    |     |     | 40     | 60      | p.Leu354Val        |    | -         | NR                        | NR                        |

M, male; F, female; TC, tumor content; VAF, variance unknown significance; CN, copy number; NR, no registration; GOF, gain of function

# Supplementary Figure S1

|        | position       |        | target sequence<br>20mer+ <b>PAM</b> (total 23mer) | sequence information |                |                  |                      | number of target sites <sup>?</sup> |               |                |
|--------|----------------|--------|----------------------------------------------------|----------------------|----------------|------------------|----------------------|-------------------------------------|---------------|----------------|
|        | start<br>- end | +<br>- |                                                    | GC% of<br>20mer      | Tm of<br>20mer | TTTT in<br>20mer | restriction<br>sites | 20mer<br>+PAM                       | 12mer<br>+PAM | 8mer<br>+PAM   |
| sgRNA6 | 304 - 326      | +      | CACTCATTGCCATGACTCTC <b>AGG</b> [gRNA]             | 50.00 %              | 70.31 °C       | -                |                      | 1 [detail]                          | 20 [detail]   | 5032 [detail]  |
| sgRNA4 | 310 - 332      | +      | TTGCCATGACTCTCAGGAAT <b>TGG</b> [gRNA]             | 45.00 %              | 70.73 °C       | -                |                      | 1 [detail]                          | 34 [detail]   | 7187 [detail]  |
| sgRNA1 | 313 - 335      | -      | <b>CCA</b> TGACTCTCAGGAATTGGCCC [gRNA]             | 55.00 %              | 75.11 °C       | -                |                      | 1 [detail]                          | 55 [detail]   | 6828 [detail]  |
| sgRNA5 | 323 - 345      | +      | CAGGAATTGGCCCTATACTT <b>AGG</b> [gRNA]             | 45.00 %              | 71.53 °C       | -                |                      | 1 [detail]                          | 5 [detail]    | 3042 [detail]  |
| sgRNA2 | 333 - 355      | -      | <b>CCC</b> TATACTTAGGCCCTTTTCT [gRNA]              | 35.00 %              | 67.32 °C       | -                |                      | 1 [detail]                          | 6 [detail]    | 3746 [detail]  |
|        | 334 - 356      | -      | <b>CCT</b> ATACTTAGGCCCTTTTCTC [gRNA]              | 40.00 %              | 68.55 °C       | -                |                      | 1 [detail]                          | 4 [detail]    | 2496 [detail]  |
|        | 346 - 368      | -      | <b>CCC</b> TTTTCTCTCTAGATGTAAT [gRNA]              | 25.00 %              | 58.98 °C       | -                | XbaI                 | 1 [detail]                          | 146 [detail]  | 20632 [detail] |
|        | 347 - 369      | -      | <b>CCT</b> TTTTCTCTCTAGATGTAATA [gRNA]             | 25.00 %              | 59.06 °C       | -                | XbaI                 | 1 [detail]                          | 77 [detail]   | 34350 [detail] |
|        | 361 - 383      | +      | GATGTAATAATGAAACTTCC <b>TGG</b> [gRNA]             | 30.00 %              | 59.76 °C       | -                |                      | 1 [detail]                          | 30 [detail]   | 6953 [detail]  |
|        | 371 - 393      | +      | TGAAACTTCCTGGACTATTT <b>TGG</b> [gRNA]             | 35.00 %              | 65.50 °C       | -                |                      | 1 [detail]                          | 25 [detail]   | 4161 [detail]  |
|        | 379 - 401      | -      | <b>CCT</b> GGACTATTTGGGCCAACAAT [gRNA]             | 40.00 %              | 68.21 °C       | -                | EaeI<br>MscI         | 1 [detail]                          | 26 [detail]   | 3167 [detail]  |
|        | 394 - 416      | -      | <b>CCA</b> ACAATGTCTCAAAATCATC [gRNA]              | 35.00 %              | 63.13 °C       | -                |                      | 1 [detail]                          | 11 [detail]   | 3902 [detail]  |
|        | 398 - 420      | +      | CAATGTCTCAAAATCATCA <b>CGG</b> [gRNA]              | 35.00 %              | 62.62 °C       | -                |                      | 1 [detail]                          | 43 [detail]   | 6295 [detail]  |
|        | 418 - 440      | +      | CGGAGATCCACTCCGAGAC <b>AGG</b> [gRNA]              | 65.00 %              | 77.32 °C       | -                |                      | 1 [detail]                          | 5 [detail]    | 4633 [detail]  |
|        | 425 - 447      | -      | <b>CCA</b> CTCCGAGACAGGAGTACCG [gRNA]              | 65.00 %              | 78.05 °C       | -                |                      | 1 [detail]                          | 12 [detail]   | 2148 [detail]  |
| sgRNA3 | 428 - 450      | +      | CTCCGAGACAGGAGTACCG <b>TGG</b> [gRNA]              | 65.00 %              | 78.05 °C       | -                | BtgI                 | 1 [detail]                          | 2 [detail]    | 635 [detail]   |
|        | 430 - 452      | -      | <b>CCC</b> GAGACAGGAGTACCGTGGAG [gRNA]             | 60.00 %              | 75.64 °C       | -                | BtgI                 | 1 [detail]                          | 26 [detail]   | 9471 [detail]  |
|        | 431 - 453      | +      | CCGAGACAGGAGTACCGTGG <b>AGG</b> [gRNA]             | 65.00 %              | 78.15 °C       | -                | BtgI                 | 1 [detail]                          | 4 [detail]    | 692 [detail]   |
|        | 431 - 453      | -      | <b>CCC</b> AGACAGGAGTACCGTGGAGG [gRNA]             | 60.00 %              | 77.54 °C       | -                | BtgI                 | 1 [detail]                          | 28 [detail]   | 9968 [detail]  |
|        | 432 - 454      | +      | CGAGACAGGAGTACCGTGG <b>GGG</b> [gRNA]              | 60.00 %              | 76.25 °C       | -                | BtgI                 | 1 [detail]                          | 4 [detail]    | 1412 [detail]  |
|        | 445 - 467      | -      | <b>CCC</b> TGGAGGGCCGTGTGACTTTC [gRNA]             | 60.00 %              | 77.33 °C       | -                | BtgI                 | 1 [detail]                          | 15 [detail]   | 7255 [detail]  |

## Target mutation (c.1403A>G)

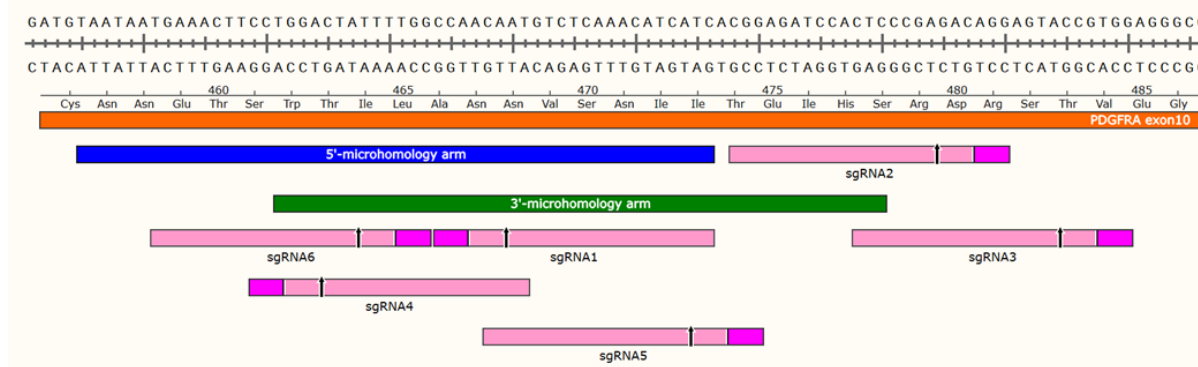

**Figure S1. Selection of sgRNA for the insertion of the targeting and excision markers into *PDGFRA* gene.**

Single-guided RNAs were designed using CRISPRdirect (<https://crispr.dbcls.jp/>); six sgRNA candidates for the introduction of the DSB near the target mutation of *PDGFRA* were selected.

# Supplementary Figure S2

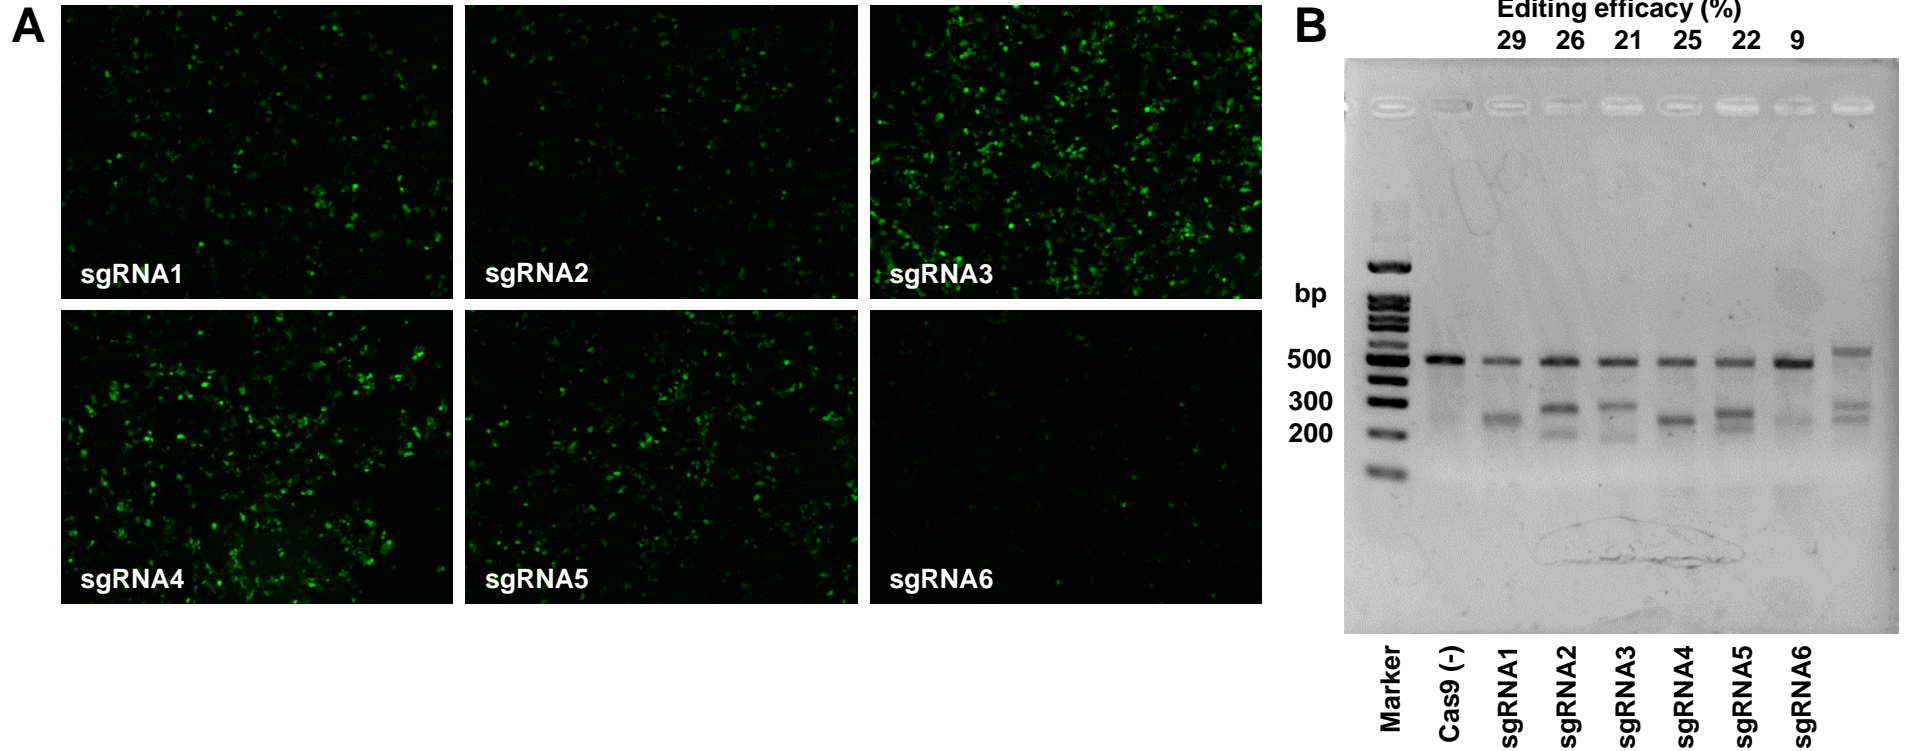

**Figure S2. Validation of the PDGFRA sgRNAs.**

**A)** The SSA assay showed that sgRNA3 and sgRNA4 exhibited the higher DSB activity, as per the monitoring of GFP signals. **B)** The T7E1 assay showed that almost comparable breaking activities were detected among the 6 sgRNAs.

# Supplementary Figure S3

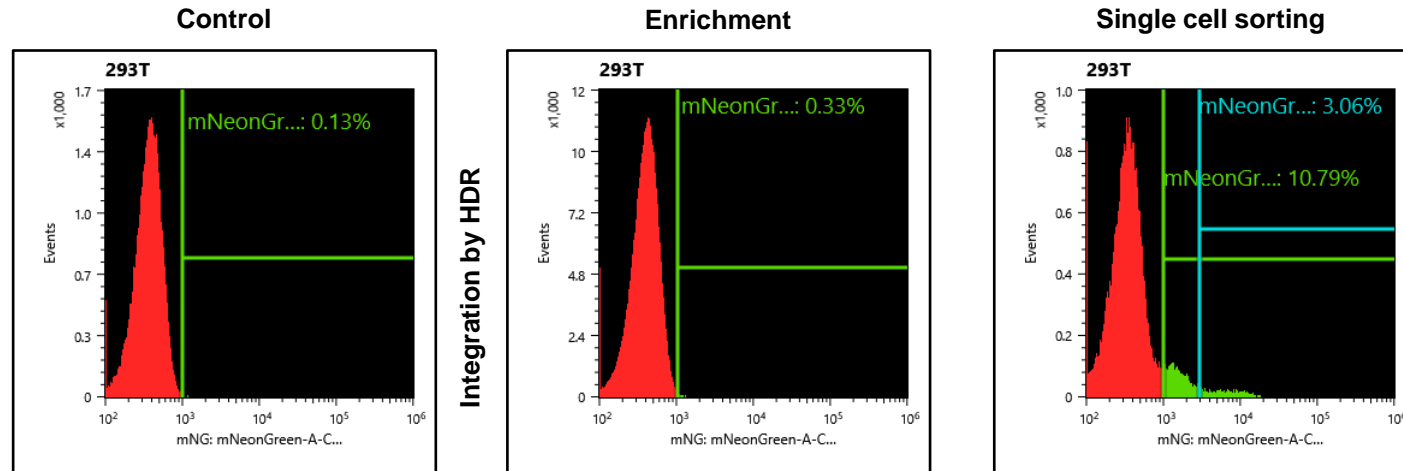

**Figure S3. Sorting of mNeonGreen-positive cells: 1st editing.**

After transfection with the Cas9 expression plasmid and donor vectors, mNeonGreen positive cells (Green) were enriched and isolated as single cells using a Cell sorter: among others, the 1D3 clone was obtained.

# Supplementary Figure S4

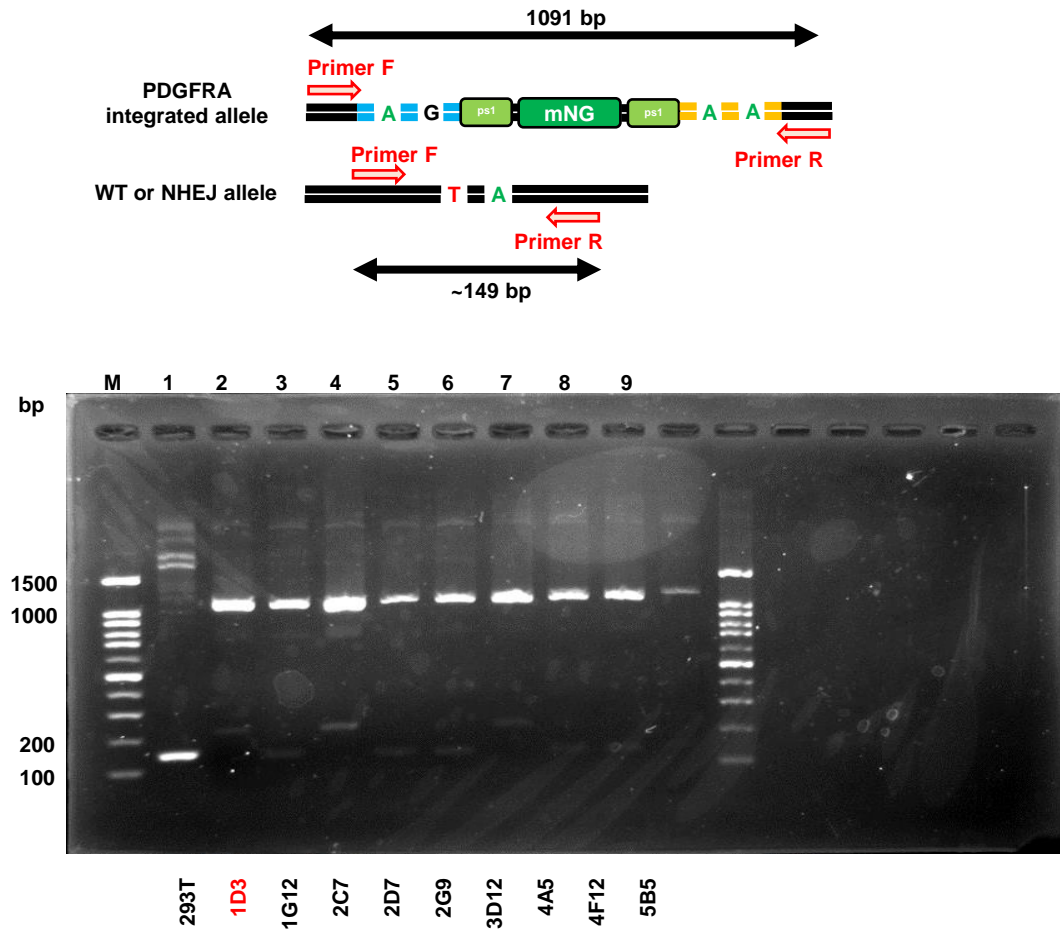

**Figure S4. Schematic presentation of the insertion of the selection cassette and PCR-based genotyping.**

A representative result of PCR-based genotyping for the identification of the insertion of the selection cassette in single clones. PCR products were analyzed using a 2% agarose gel: lane 1, parental HEK293T cells; lane 2, clone 1D3; and lanes 3 to 9, other clones.

# Supplementary Figure S5

5'-Junction

Clone 1D3

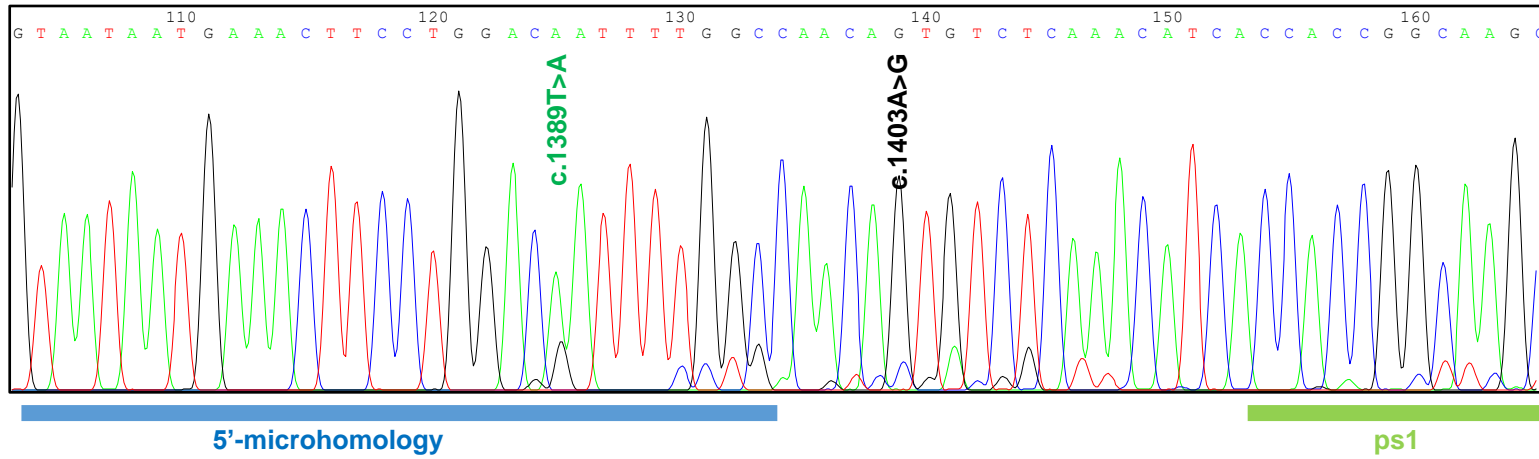

5'-internal homology

3'-Junction

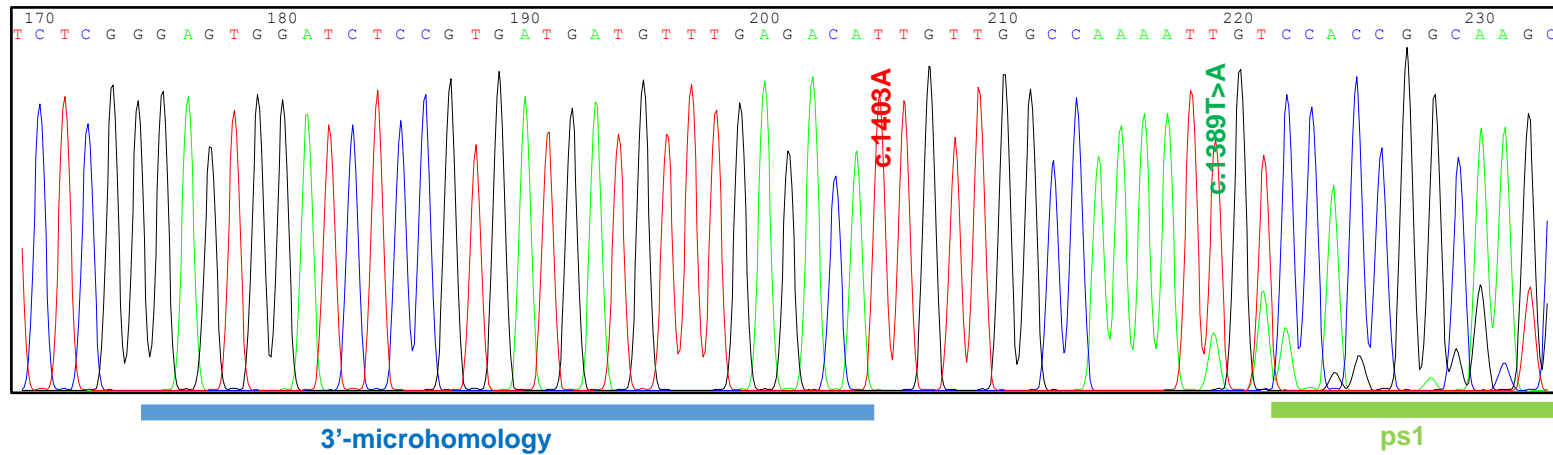

3'-internal homology

**Figure S5. Sanger sequencing data of the clone 1D3.**

Sanger sequencing revealed the correct insertion of the selection cassette in the clone 1D3.

# Supplementary Figure S6

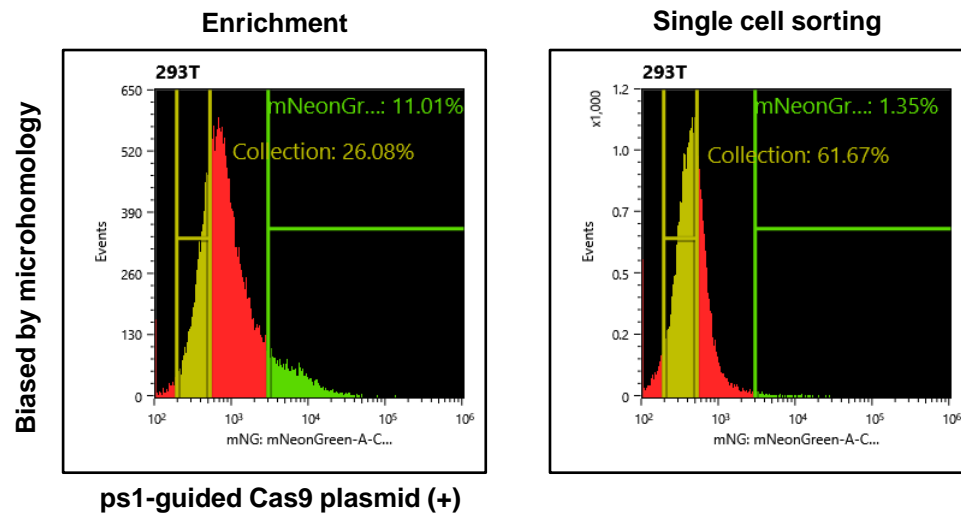

**Figure S6. Sorting of mNeonGreen-negative cells: 2nd editing round.**

The selection cassette was deleted out of the *PDGFRA* gene in clone 1D3. Using a cell sorter, mNeonGreen-negative cells were selected and cells harboring the target gene mutation as well as isogenic control cells were obtained.



# Supplementary Figure S7

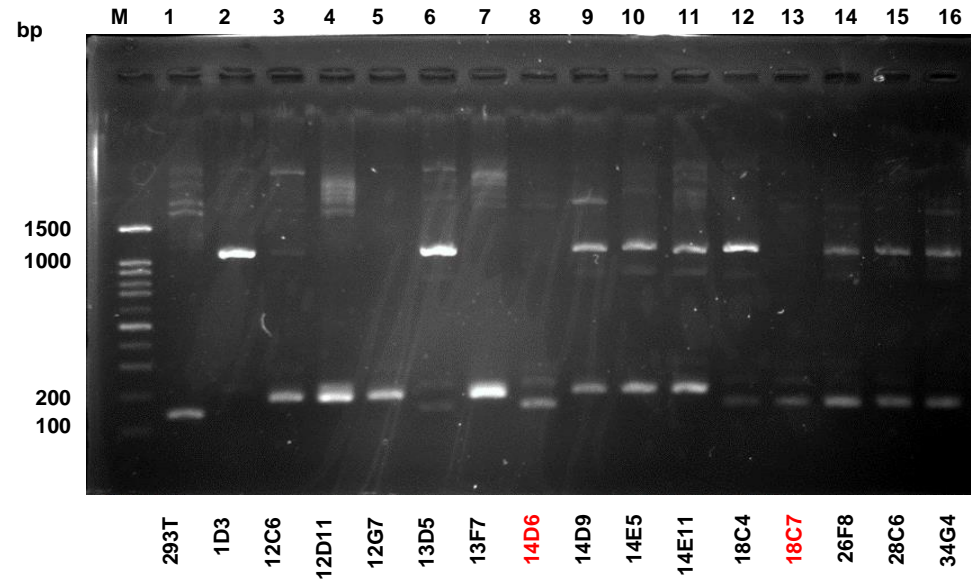

**Figure S7. PCR-based analysis for the removal of the cassette in the selected clones.**

Gel analysis of the edited clones. Lane 1, HEK293T parental cells; lane 2, clone 1D3; lane 8, clone 14D6 (precise mutation); lane 13, clone 18C7 (isogenic control). PCR bands from the selected clones revealed the removal of the cassette.

# Supplementary Figure S8

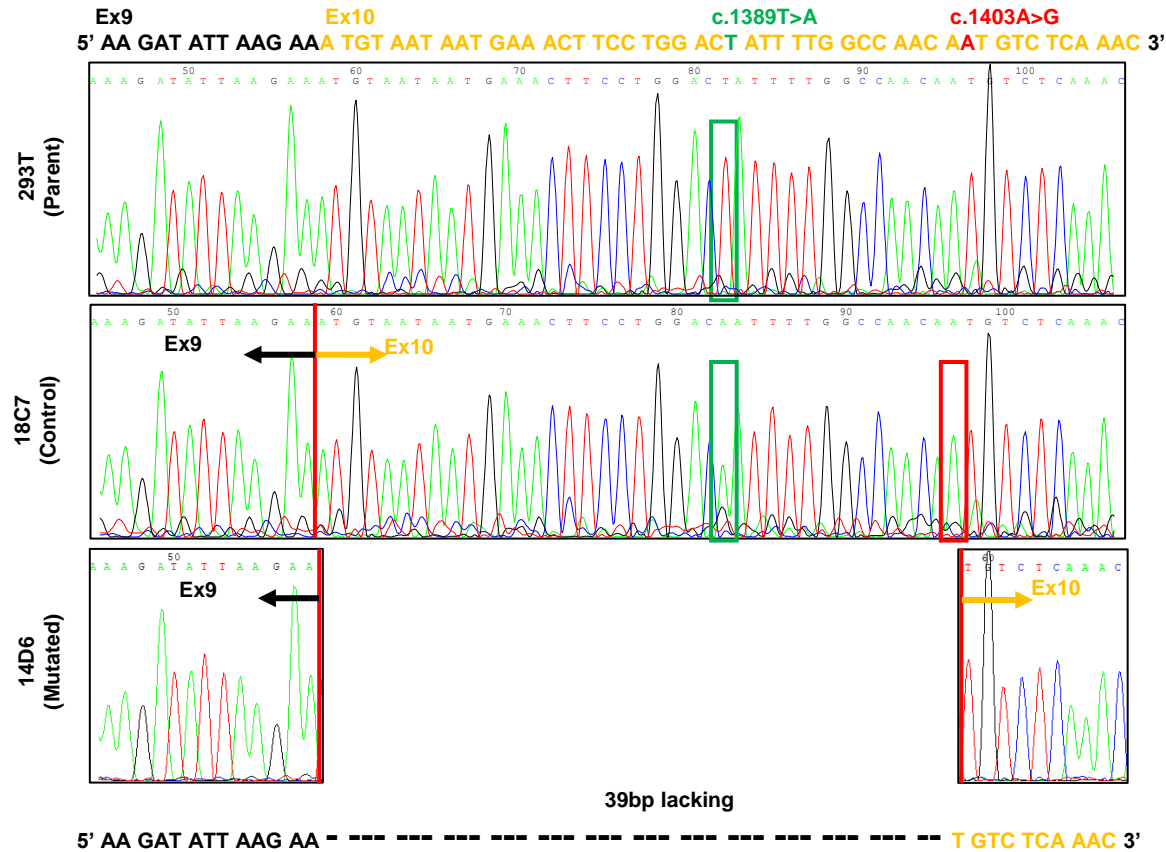

**Figure S8. Structure of *PDGFRA* mRNA after the introduction of c.1403A>G mutation.**

Sanger sequencing results of the established clones. Green and red boxes indicate the silent and targeted mutations, respectively. In clone 14D6, but not in control 18C7 (isogenic control) and parental cells, the first 39 bp of exon 10 were deleted due to the generation of a new splicing site at position 1403 because of c.1403A>G mutation.

# Supplementary Figure S9

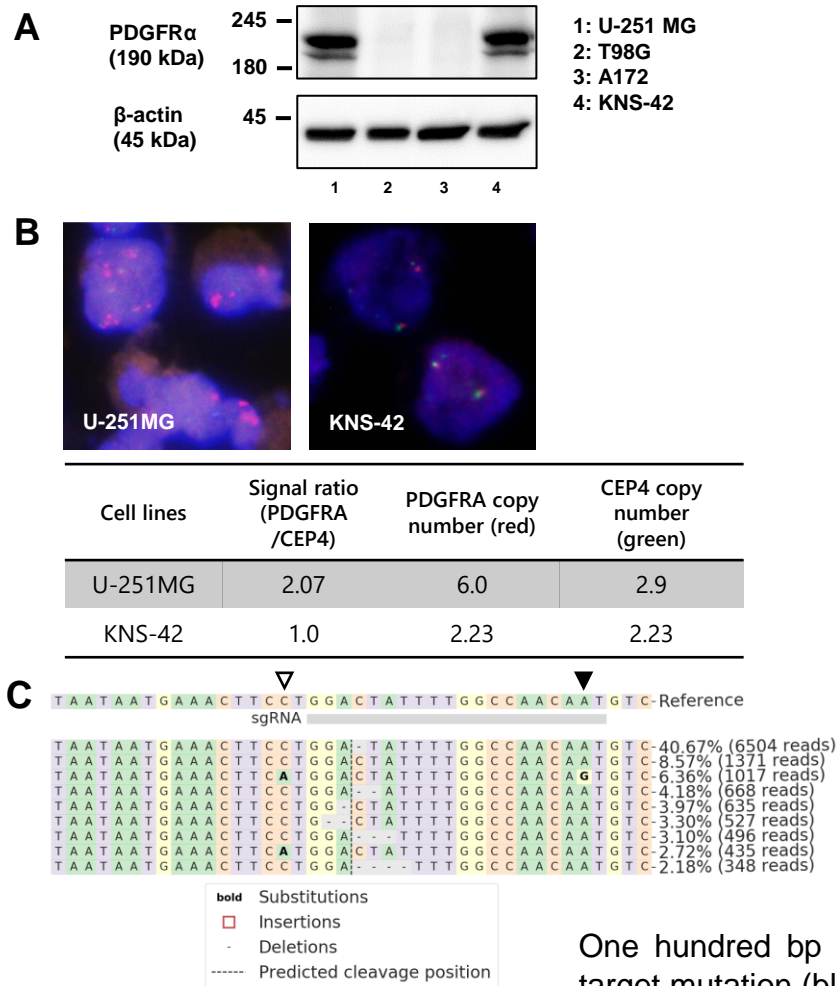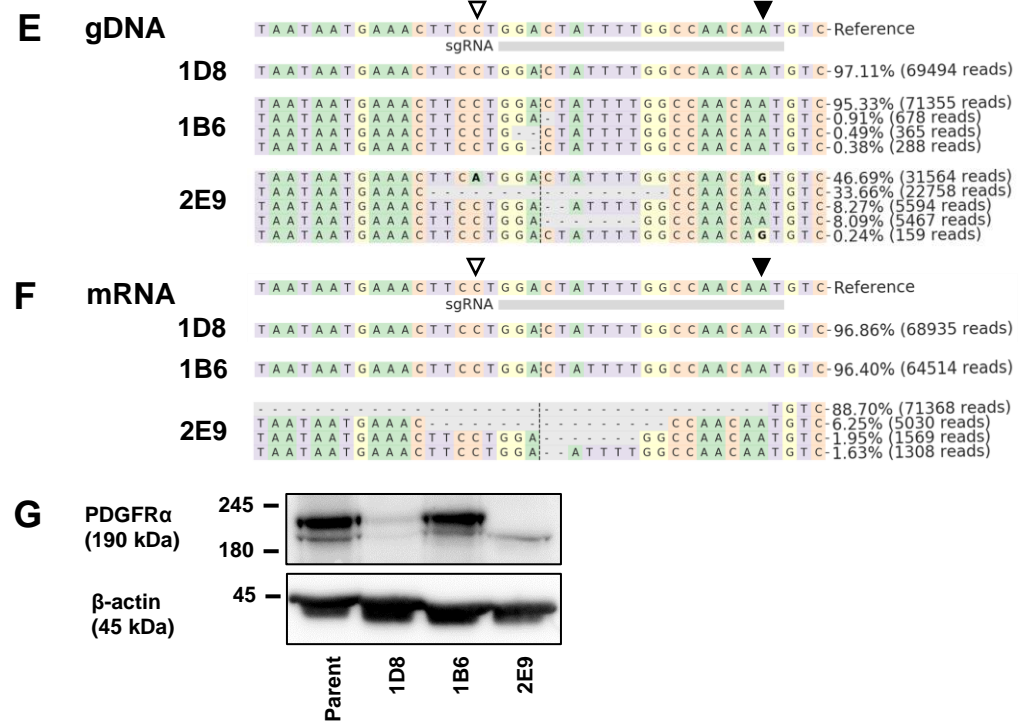

**Figure S9. Glioblastoma cell lines with *PDGFRA* mutation**

To select glioblastoma cell lines suitable for genome editing, western blotting of PDGFRα (A) and FISH (B) of *PDGFRA* were performed. KNS-42 cells, expressing high level of PDGFRα and having close to normal copy number, were selected.

One hundred bp single-stranded ODN with the silent mutation (white arrowhead) and the target mutation (black arrowhead), and Cas9 RNP were electroporated into KNS-42 cells, and the target mutation (6.36%) in the genomic DNA was confirmed by NGS (C). Edited KNS-42 cells were sorted after electroporation; however, the cloned cells did not expand after 3-week-subculture (D). U-251 MG cell line was edited by the same method, and the cloned cells with the mutation (2E9, 46.69%) and wildtype cloned cells (1D8, 97.11%; 1B6, 95.33%) were expanded (E). The 2E9 cells harbored the splice variant (p.K455\_N468delinsN) (88.70%) (F). However, PDGFRα (G) were not sufficiently expressed in the parental wildtype 1D8 and mutated 2E9 clones. For uncropped blot sources of Figs. S9A and S9G, see Supplemental Fig. S14.

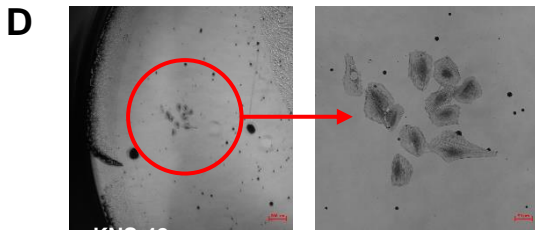

# Supplementary Figure S10

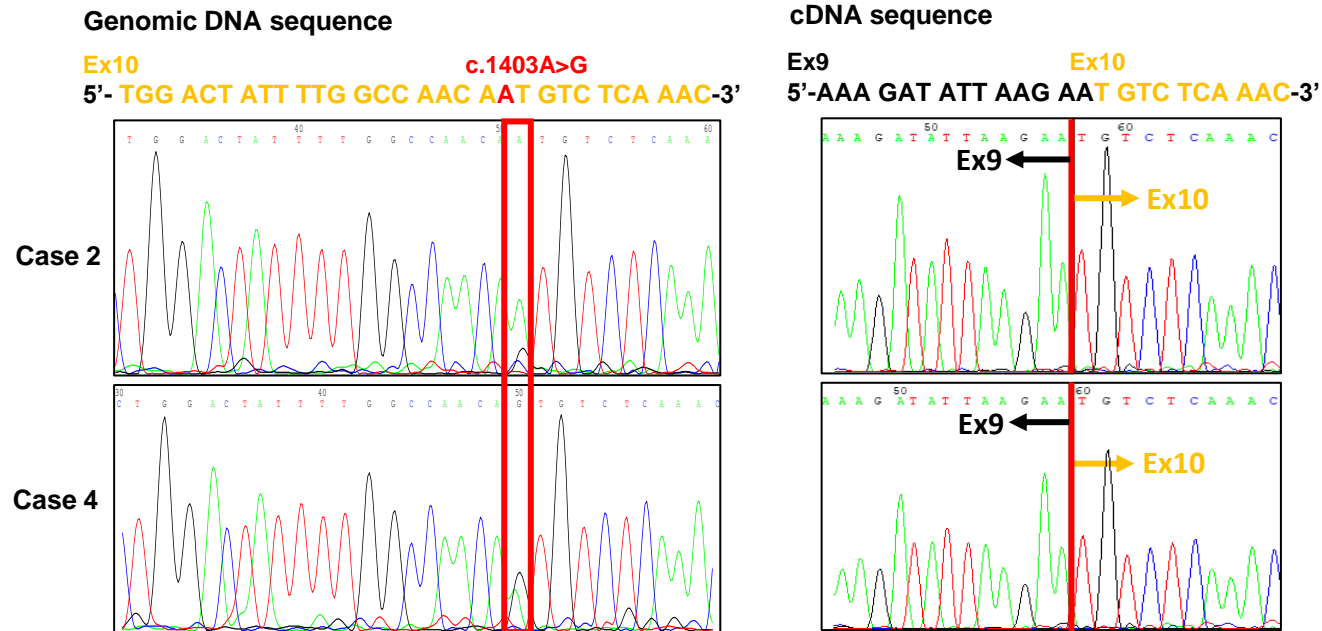

**Figure S10. Genomic and mRNA sequencing of GBM clinical cases.**

Genomic and mRNA sequences of *PDGFRA* were analyzed in the GBM cases. The c.1403A>G mutation and the subsequent *PDGFRA* splicing variant (and not the missense mutation p.N468S) was confirmed. Sanger sequencing (left) showed a main [A] peak at c.1403, but also a minor [G] peak in Case 1. Two peaks – main [G] and minor [A] peaks - were also detected in Case 2. As per the mRNA sequencing (right), only mRNA with the in-frame internal deletion was observed in both cases.

# Supplementary Figure S11

Extended Figure 2C

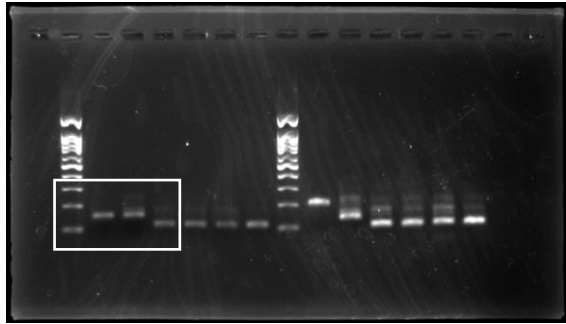

Extended Figure 4A

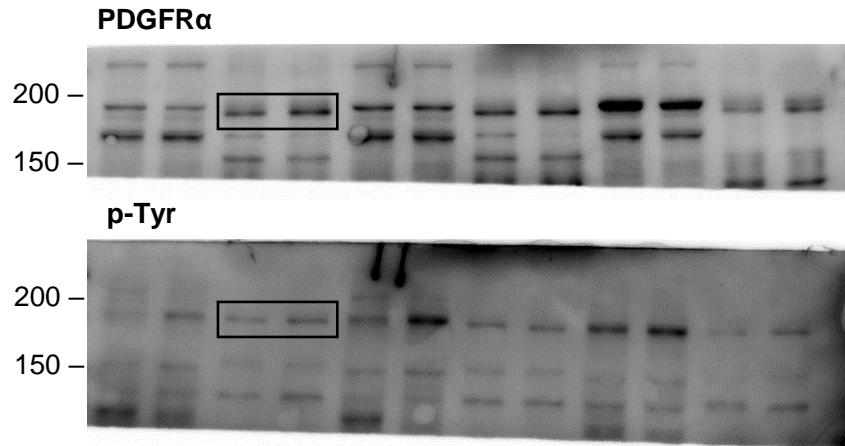

Extended Figure 4C

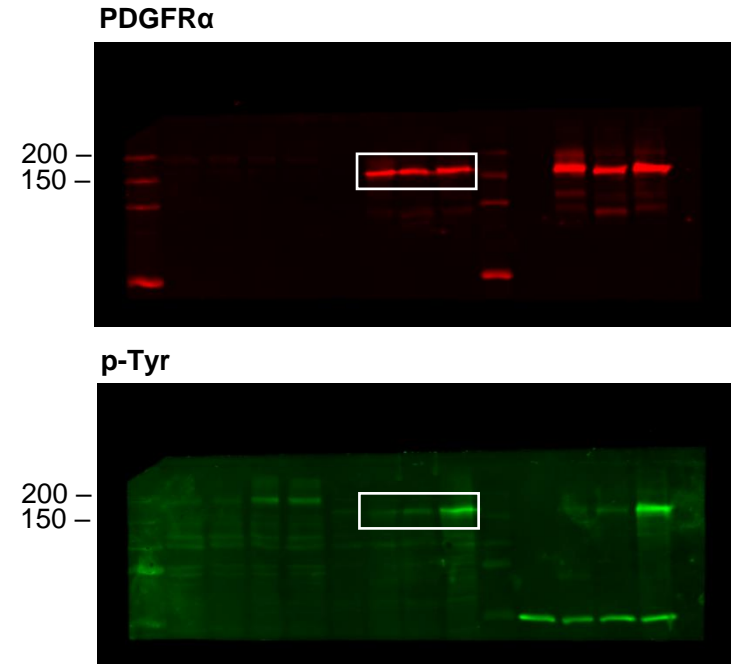

**Figure S11. Extended data of Figs. 2C, 4A, and 4C.**

Uncropped original gel electrophoresis and blot data of Figs. 2C, 4A, and 4C. The main-text figures are shown above each gel with a black outline to show the excerpted portions.

# Supplementary Figure S12

## Extended Figure 4D

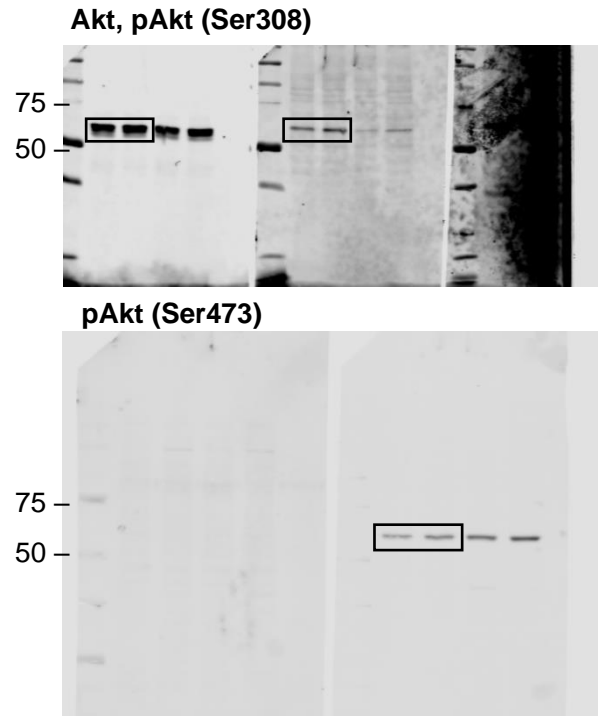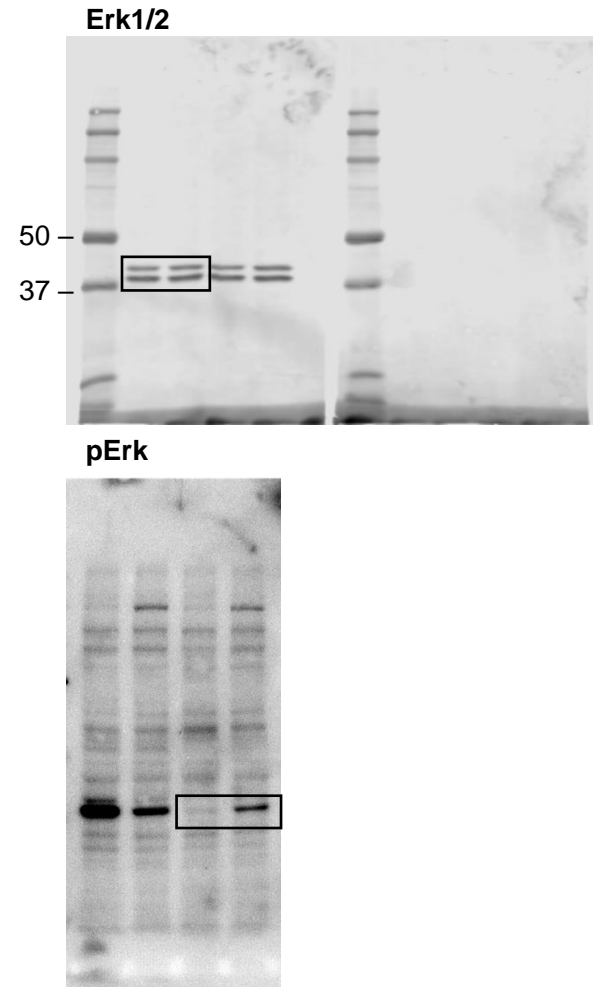

**Figure S12. Extended data of Fig. 4D.**

Uncropped original blot data of Fig. 4D. The main-text figures are shown above each gel with a black outline to show the excerpted portions.

# Supplementary Figure S13

## Extended Figure 5A

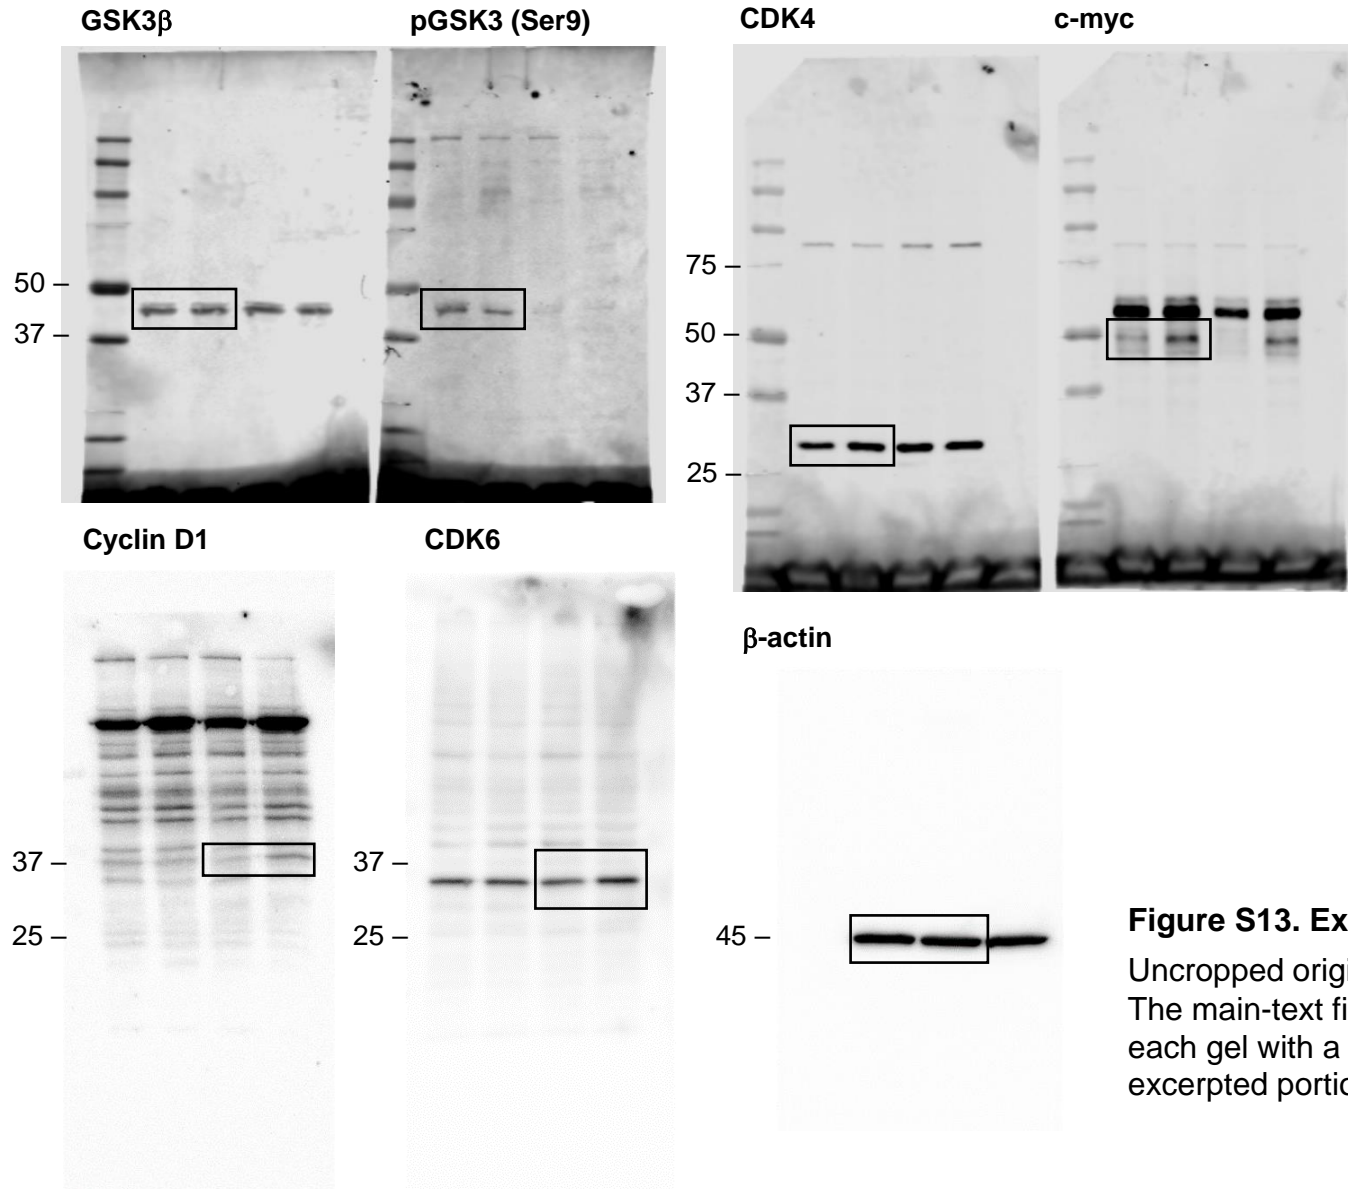

**Figure S13. Extended data of Fig. 5A.**

Uncropped original blot data of Fig. 5A. The main-text figures are shown above each gel with a black outline to show the excerpted portions.



# Supplementary Figure S14

Extended Figures S9A

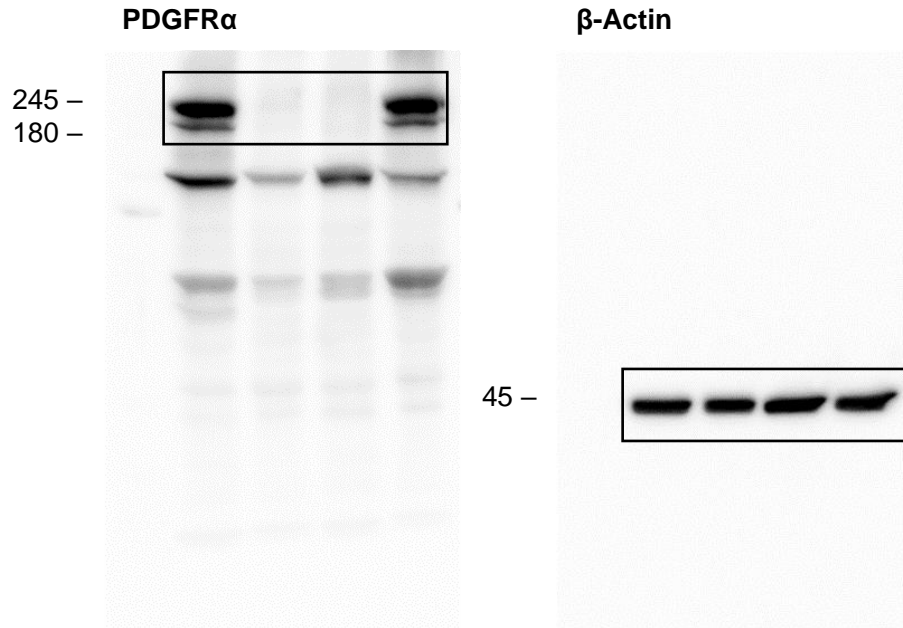

Extended Figures S9G

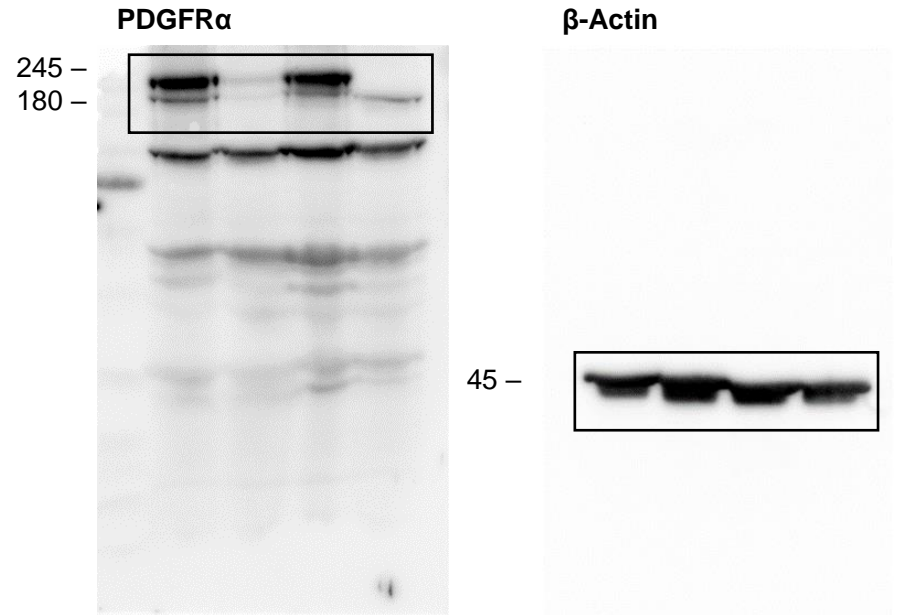

**Figure S14. Extended data of Fig. S9A and S9G.**

Uncropped original blot data of Figs. S9A and S9G. The main-text figures are shown above each gel with a black outline to show the excerpted portions.



# Supplementary Table S2

## Sequences of DNA oligonucleotides

|                            | Oligonucleotides | Sequences (5' – 3')       |
|----------------------------|------------------|---------------------------|
| <i>PDGFRA</i> gene editing | sgRNA1_top       | CACCGATGATGTTTGAGACATTGT  |
|                            | sgRNA1_bottom    | AAACACAATGTCTCAAACATCATC  |
|                            | sgRNA2_top       | CACCGCGGAGATCCACTCCCGAGAC |
|                            | sgRNA2_bottom    | AAACGTCTCGGGAGTGGATCTCCGC |
|                            | sgRNA3_top       | CACCGCTCCCGAGACAGGAGTACCG |
|                            | sgRNA3_bottom    | AAACCGTACTCCTGTCTCGGGAGC  |
|                            | sgRNA4_top       | CACCGATTGTTGGCCAAAATAGTCC |
|                            | sgRNA4_bottom    | AAACGGACTATTTTGGCCAACAATC |
|                            | sgRNA5_top       | CACCGCAATGTCTCAAACATCATCA |
|                            | sgRNA5_bottom    | AAACTGATGATGTTTGAGACATTGC |
|                            | sgRNA6_top       | CACCGTGAAACTTCTGGACTATTT  |
|                            | sgRNA6_bottom    | AAACAAATAGTCCAGGAAGTTTCAC |

# Supplementary Table S3

## Sequencing primers

|                                                | Primers                            | Sequences (5' – 3')                                                                                                                         |
|------------------------------------------------|------------------------------------|---------------------------------------------------------------------------------------------------------------------------------------------|
| <b>Vector construction</b>                     |                                    |                                                                                                                                             |
| <b>Donor</b>                                   | Left homology arm_F                | CCGCGTTACATAGCAAGAAGGTCCAGGGCTCTCA                                                                                                          |
|                                                | Left homology arm_R                | TGTTGGCCAAAATGTCCAGGAAGTTTCATTATTA                                                                                                          |
|                                                | Right homology arm_F               | TGGACaATTTTGGCCAACAaTGCTCTAAACATCAT                                                                                                         |
|                                                | Right homology arm_R               | CAGCATTCTAGAGCAAGGGCTGCCTGGTTTCTTTT                                                                                                         |
|                                                | mNeonGreen_F                       | CTGGACaATTTTGGCCAACAgTGTCTCAAACATCACCACCGGCAAGCTGCCCGTGCCCGCCACAAACTTCTCTC<br>TGCTAAAGCAAGCAGGTGATGTTGAAGAAAACCCCGGGCCTGTCGCCACCATGGTGAGCAA |
|                                                | mNeonGreen_R                       | tTGTGGCCAAAATGTCCACCAGGCAAGCTGCCCGTGCCCGTTCGACTTCTAGATTTAATTAAGCTGAGCCTAGGGC<br>CGGGATTCTCCTCCA                                             |
|                                                | pCRIS_F                            | TGCTCTAGAATGCTGATGGGCTAGCAAATC                                                                                                              |
|                                                | pCRIS_R                            | TGCTATGTAACGCGGAAGTCCATATATGCG                                                                                                              |
| <b>PDGFR<math>\alpha</math> overexpression</b> | <i>PDGFR</i> $\alpha$ DNA_F        | CAAAAGCTTGTACAAAAAAGTTGGCACCATG                                                                                                             |
|                                                | <i>PDGFR</i> $\alpha$ DNA_R        | AAAGTCGACCTACAGGAAGCTGTCTCCACCAG                                                                                                            |
|                                                | <i>PDGFR</i> $\alpha$ mt_M260I_F   | TgCTGGAAGAAATCAAAGTCCCAT                                                                                                                    |
|                                                | <i>PDGFR</i> $\alpha$ mt_M260I_R   | TTGTGATGCCTTTGCCTTTCACTT                                                                                                                    |
|                                                | <i>PDGFR</i> $\alpha$ mt_E10del2_F | AgTGTCTCAAACATCATCACGGAGATC                                                                                                                 |
|                                                | <i>PDGFR</i> $\alpha$ mt_E10del2_R | GTTGGCCAAAATAGTCCAGGAAGTTTC                                                                                                                 |
|                                                | <i>PDGFR</i> $\alpha$ mt_D842V_F   | GiCATCATGCATGATTCGAAGTATGTGTCG                                                                                                              |
|                                                | <i>PDGFR</i> $\alpha$ mt_D842V_R   | TCTGGCCAGGCCAAAGTCACAGATC                                                                                                                   |
| <b>SSA assay</b>                               | SSA_ <i>PDGFR</i> $\alpha$ _F      | TCAGCGAATTCTTTTTGAAGGGGTGGGAGATTGA                                                                                                          |
|                                                | SSA_ <i>PDGFR</i> $\alpha$ _R      | TAAGGATCCGGATTCAAAGTTCCGCCTGGG                                                                                                              |
| <b>T7E1 assay</b>                              |                                    |                                                                                                                                             |
|                                                | <i>PDGFR</i> $\alpha$ -KI_F        | GCTATGTAACACTTAGCTTTTCAGTTGTTTCATGTG                                                                                                        |
|                                                | <i>PDGFR</i> $\alpha$ -KI_R        | TTCTATATAACCCCTATCTGGGATTCAAAGTTCC                                                                                                          |

# Supplementary Table S3 (continued)

## Sequencing primers

|                                | Primers                    | Sequences (5' – 3')      |
|--------------------------------|----------------------------|--------------------------|
| <b>Genomic PCR for cloning</b> |                            |                          |
|                                | <i>PDGFRA</i> -gDNA_F      | AGGAATTGGCCCTATACTTAGG   |
|                                | <i>PDGFRA</i> -gDNA/mRNA_R | TTGGCGAAAGTCACACG        |
|                                | <i>PDGFRA</i> -KI_F2       | AATCAGTGTGTATTGCCCGG     |
|                                | <i>PDGFRA</i> -KI_R2       | TCTGGGATTCAAAGTTCCGC     |
| <b>Messenger RNA analysis</b>  |                            |                          |
|                                | <i>PDGFRA</i> -mRNA_F      | CCTGATATTGAGTGGATGATATGC |
|                                | <i>PDGFRA</i> -gDNA/mRNA_R | TTGGCGAAAGTCACACG        |

# Supplementary Table S4

## Sequences of hydrolysis probes

| Probes                                                             | Sequences (5' – 3')                                          |
|--------------------------------------------------------------------|--------------------------------------------------------------|
| Assay ID: Hs.PT.58.45699973<br>(Integrated DNA Technologies, Inc.) | <i>PDGFRA</i> exons 22-23 (mixture of probe and primer pair) |
| <i>PDGFRA</i> -WT(A)_FAM                                           | TGAGACATTGTTGG                                               |
| <i>PDGFRA</i> -MT(E10del2)_FAM                                     | TGAGACATTCTTAATATCT                                          |
